# Supplementary material for: Comparative transcriptome analysis of root, stem, and leaf tissues of Entada phaseoloides reveals potential genes involved in triterpenoid saponin biosynthesis
Source: PubMed Central journal article supplement (PMC7493163; doi:10.1186/s12864-020-07056-1), 2020-09-15

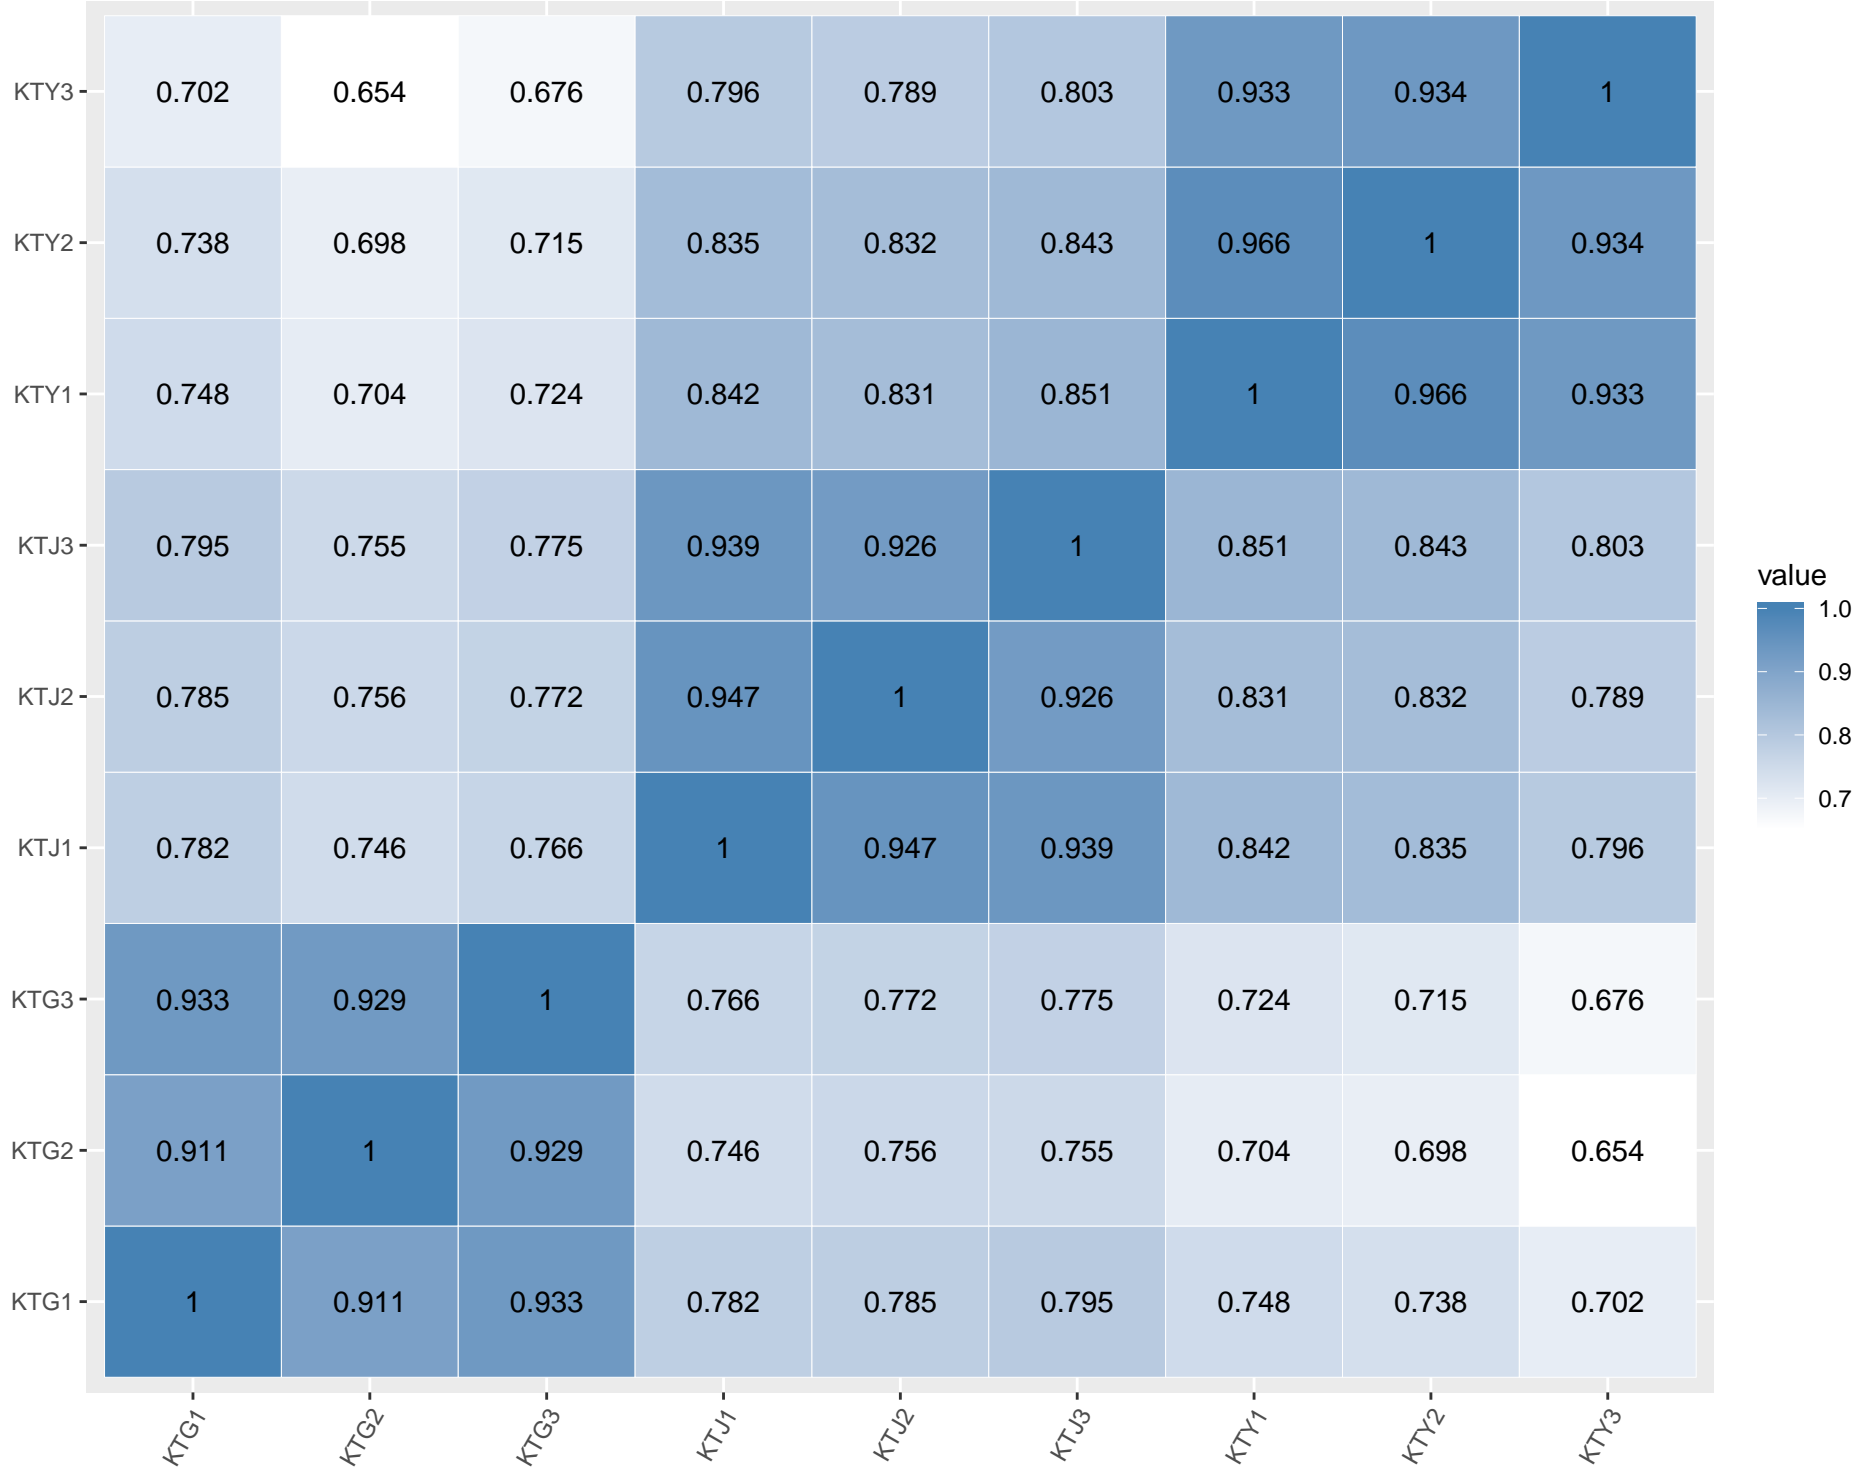

Supplement: 12864_2020_7056_MOESM2_ESM.pdf [file 12864_2020_7056_MOESM2_ESM.pdf]
